# Supplementary material
Source: ML conference proceedings conference paper supplement (https://www.ecva.net/papers/eccv_2020/papers_ECCV/html/123600018_ECCV_2020_paper.php)
Supplement: Supplementary file 1 [file 123600018-supp.zip]

# Supplementary Materials of “Graph-Based Social Relation Reasoning”

Wanhua Li<sup>1,2,3</sup>, Yueqi Duan<sup>1,2,3,5,†</sup>, Jiwen Lu<sup>1,2,3,\*</sup>, Jianjiang Feng<sup>1,2,3</sup>, and Jie Zhou<sup>1,2,3,4</sup>

<sup>1</sup> Department of Automation, Tsinghua University, China

<sup>2</sup> State Key Lab of Intelligent Technologies and Systems, China

<sup>3</sup> Beijing National Research Center for Information Science and Technology, China

<sup>4</sup> Tsinghua Shenzhen International Graduate School, Tsinghua University, China

<sup>5</sup> Stanford University

li-wh17@mails.tsinghua.edu.cn, duanyq19@stanford.edu,  
{lujiwen, jfeng, jzhou}@tsinghua.edu.cn

## 1 Pipeline

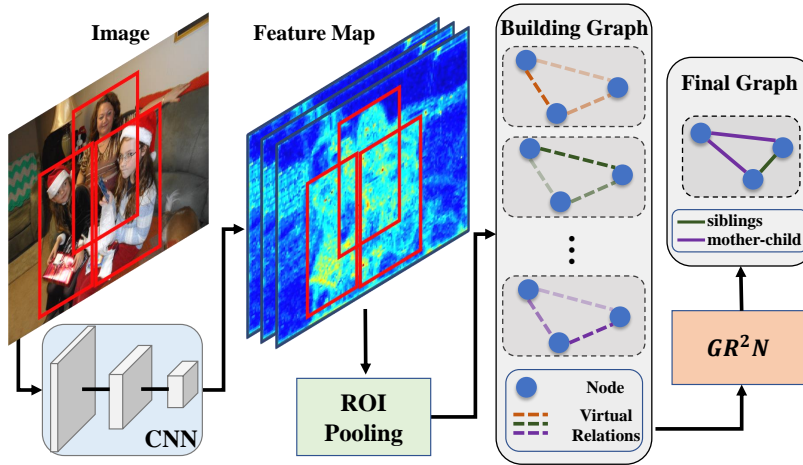

**Fig. 1.** An overall pipeline of our proposed method. For a given image, we first use a CNN to extract features. Then the features of people in the image are obtained from the last shared feature map using an RoI pooling layer. These features are set as the initial node embeddings. Several virtual relation graphs with shared node representations are constructed to exploit type-specific logical constraints. Finally, the proposed  $GR^2N$  is used to generate a reasonable and consistent social relation graph.

Fig. 1 depicts the overall pipeline of our proposed  $GR^2N$ .

<sup>†</sup> Work done while at Tsinghua University.

\* Corresponding author

## 2 Convergence

To show the convergence of our method, we list the numerical results of GR<sup>2</sup>N on the PIPA dataset in Table 1. We observe that our method eventually converges.

**Table 1.** We show how the loss function value of our method changes during the training stage as the number of iterations increases.

| Iters | 0     | 10    | 50    | 100   | 500   | 1000  | 5000  |
|-------|-------|-------|-------|-------|-------|-------|-------|
| Loss  | 0.676 | 0.520 | 0.374 | 0.258 | 0.144 | 0.102 | 0.087 |
