# Supplementary material
Source: ML conference proceedings conference paper supplement (https://www.ecva.net/papers/eccv_2020/papers_ECCV/html/123600018_ECCV_2020_paper.php)
Supplement: Supplementary file 3 [file 123600018-supp.zip]

Archive with 19 entries (19 files):
- framework2.pdf
- history.txt
- llncs.cls
- README.txt
- ruler.sty
- splncs.bst
- splncs04.bst
- 2287-supp.aux
- 2287-supp.bbl
- 2287-supp.blg
- 2287-supp.log
- 2287-supp.pdf
- 2287-supp.tex
- 2287-supp.tex.bak
- comment.sty
- cvpr_eso.sty
- egbib.bib
- egbib.bib.bak
- eso-pic.sty
