# Supplementary material
Source: ML conference proceedings conference paper supplement (https://www.ecva.net/papers/eccv_2020/papers_ECCV/html/123600018_ECCV_2020_paper.php)
Supplement: Supplementary file 3 [file 123600018-supp.zip › 2287-supp.aux]

\relax 
\@writefile{toc}{\contentsline {title}{Supplementary Materials of ``Graph-Based Social Relation Reasoning"}{1}}
\@writefile{toc}{\authcount {5}}
\@writefile{toc}{\contentsline {author}{Wanhua Li \and Yueqi Duan$^{\dagger }$ \and Jiwen Lu$^{\ast }$ \and Jianjiang Feng \and Jie Zhou}{1}}
\@writefile{toc}{\contentsline {section}{\numberline {1}Pipeline}{1}}
\@writefile{lof}{\contentsline {figure}{\numberline {1}{\ignorespaces  An overall pipeline of our proposed method. For a given image, we first use a CNN to extract features. Then the features of people in the image are obtained from the last shared feature map using an RoI pooling layer. These features are set as the initial node embeddings. Several virtual relation graphs with shared node representations are constructed to exploit type-specific logical constraints. Finally, the proposed GR$^2$N is used to generate a reasonable and consistent social relation graph. }}{1}}
\newlabel{fig:framework}{{1}{1}}
\@writefile{toc}{\contentsline {section}{\numberline {2}Convergence}{2}}
\@writefile{lot}{\contentsline {table}{\numberline {1}{\ignorespaces We show how the loss function value of our method changes during the training stage as the number of iterations increases.}}{2}}
\newlabel{table:convergece}{{1}{2}}
