# Supplementary material
Source: ML conference proceedings conference paper supplement (https://www.ecva.net/papers/eccv_2020/papers_ECCV/html/123600018_ECCV_2020_paper.php)
Supplement: Supplementary file 3 [file 123600018-supp.zip › 2287-supp.blg]

This is BibTeX, Version 0.99dThe top-level auxiliary file: 2287-supp.aux
I found no \citation commands---while reading file 2287-supp.aux
I found no \bibdata command---while reading file 2287-supp.aux
I found no \bibstyle command---while reading file 2287-supp.aux
(There were 3 error messages)
