# Supplementary material
Source: ML conference proceedings conference paper supplement (https://www.ecva.net/papers/eccv_2020/papers_ECCV/html/123600018_ECCV_2020_paper.php)
Supplement: Supplementary file 3 [file 123600018-supp.zip › 2287-supp.log]

This is pdfTeX, Version 3.1415926-2.3-1.40.12 (MiKTeX 2.9) (preloaded format=pdflatex 2019.5.14)  16 JUL 2020 14:35
entering extended mode
**D:/contribute/ECCV2020/Social*Relation/camera*ready/supp/2287-supp.tex
("D:/contribute/ECCV2020/Social Relation/camera ready/supp/2287-supp.tex"
LaTeX2e <2011/06/27>
Babel <v3.8m> and hyphenation patterns for loaded.
("D:\contribute\ECCV2020\Social Relation\camera ready\supp\llncs.cls"
Document Class: llncs 2018/03/10 v2.20 
 LaTeX document class for Lecture Notes in Computer Science
(C:\Softwares\CTeX\work\CTEX\MiKTeX\tex\latex\base\article.cls
Document Class: article 2007/10/19 v1.4h Standard LaTeX document class
(C:\Softwares\CTeX\work\CTEX\MiKTeX\tex\latex\base\size10.clo
File: size10.clo 2007/10/19 v1.4h Standard LaTeX file (size option)
)
\c@part=\count79
\c@section=\count80
\c@subsection=\count81
\c@subsubsection=\count82
\c@paragraph=\count83
\c@subparagraph=\count84
\c@figure=\count85
\c@table=\count86
\abovecaptionskip=\skip41
\belowcaptionskip=\skip42
\bibindent=\dimen102
)
(C:\Softwares\CTeX\work\CTEX\MiKTeX\tex\latex\tools\multicol.sty
Package: multicol 2011/06/27 v1.7a multicolumn formatting (FMi)
\c@tracingmulticols=\count87
\mult@box=\box26
\multicol@leftmargin=\dimen103
\c@unbalance=\count88
\c@collectmore=\count89
\doublecol@number=\count90
\multicoltolerance=\count91
\multicolpretolerance=\count92
\full@width=\dimen104
\page@free=\dimen105
\premulticols=\dimen106
\postmulticols=\dimen107
\multicolsep=\skip43
\multicolbaselineskip=\skip44
\partial@page=\box27
\last@line=\box28
\mult@rightbox=\box29
\mult@grightbox=\box30
\mult@gfirstbox=\box31
\mult@firstbox=\box32
\@tempa=\box33
\@tempa=\box34
\@tempa=\box35
\@tempa=\box36
\@tempa=\box37
\@tempa=\box38
\@tempa=\box39
\@tempa=\box40
\@tempa=\box41
\@tempa=\box42
\@tempa=\box43
\@tempa=\box44
\@tempa=\box45
\@tempa=\box46
\@tempa=\box47
\@tempa=\box48
\@tempa=\box49
\c@columnbadness=\count93
\c@finalcolumnbadness=\count94
\last@try=\dimen108
\multicolovershoot=\dimen109
\multicolundershoot=\dimen110
\mult@nat@firstbox=\box50
\colbreak@box=\box51
\multicol@sort@counter=\count95
)
(C:\Softwares\CTeX\work\CTEX\MiKTeX\tex\latex\oberdiek\aliascnt.sty
Package: aliascnt 2009/09/08 v1.3 Alias counter (HO)

(C:\Softwares\CTeX\work\CTEX\MiKTeX\tex\latex\carlisle\remreset.sty))
\c@chapter=\count96
LaTeX Font Info:    Redeclaring math symbol \Gamma on input line 362.
LaTeX Font Info:    Redeclaring math symbol \Delta on input line 363.
LaTeX Font Info:    Redeclaring math symbol \Theta on input line 364.
LaTeX Font Info:    Redeclaring math symbol \Lambda on input line 365.
LaTeX Font Info:    Redeclaring math symbol \Xi on input line 366.
LaTeX Font Info:    Redeclaring math symbol \Pi on input line 367.
LaTeX Font Info:    Redeclaring math symbol \Sigma on input line 368.
LaTeX Font Info:    Redeclaring math symbol \Upsilon on input line 369.
LaTeX Font Info:    Redeclaring math symbol \Phi on input line 370.
LaTeX Font Info:    Redeclaring math symbol \Psi on input line 371.
LaTeX Font Info:    Redeclaring math symbol \Omega on input line 372.
\tocchpnum=\dimen111
\tocsecnum=\dimen112
\tocsectotal=\dimen113
\tocsubsecnum=\dimen114
\tocsubsectotal=\dimen115
\tocsubsubsecnum=\dimen116
\tocsubsubsectotal=\dimen117
\tocparanum=\dimen118
\tocparatotal=\dimen119
\tocsubparanum=\dimen120
\@tempcntc=\count97
\fnindent=\dimen121
\c@@inst=\count98
\c@@auth=\count99
\c@auco=\count100
\instindent=\dimen122
\authrun=\box52
\authorrunning=\toks14
\tocauthor=\toks15
\titrun=\box53
\titlerunning=\toks16
\toctitle=\toks17
\c@theorem=\count101
\c@case=\count102
\c@conjecture=\count103
\c@corollary=\count104
\c@definition=\count105
\c@example=\count106
\c@exercise=\count107
\c@lemma=\count108
\c@note=\count109
\c@problem=\count110
\c@property=\count111
\c@proposition=\count112
\c@question=\count113
\c@solution=\count114
\c@remark=\count115
\headlineindent=\dimen123
)
(C:\Softwares\CTeX\work\CTEX\MiKTeX\tex\latex\graphics\graphicx.sty
Package: graphicx 1999/02/16 v1.0f Enhanced LaTeX Graphics (DPC,SPQR)

(C:\Softwares\CTeX\work\CTEX\MiKTeX\tex\latex\graphics\keyval.sty
Package: keyval 1999/03/16 v1.13 key=value parser (DPC)
\KV@toks@=\toks18
)
(C:\Softwares\CTeX\work\CTEX\MiKTeX\tex\latex\graphics\graphics.sty
Package: graphics 2009/02/05 v1.0o Standard LaTeX Graphics (DPC,SPQR)

(C:\Softwares\CTeX\work\CTEX\MiKTeX\tex\latex\graphics\trig.sty
Package: trig 1999/03/16 v1.09 sin cos tan (DPC)
)
(C:\Softwares\CTeX\work\CTEX\MiKTeX\tex\latex\00miktex\graphics.cfg
File: graphics.cfg 2007/01/18 v1.5 graphics configuration of teTeX/TeXLive
)
Package graphics Info: Driver file: pdftex.def on input line 91.

(C:\Softwares\CTeX\work\CTEX\MiKTeX\tex\latex\pdftex-def\pdftex.def
File: pdftex.def 2011/05/27 v0.06d Graphics/color for pdfTeX

(C:\Softwares\CTeX\work\CTEX\MiKTeX\tex\generic\oberdiek\infwarerr.sty
Package: infwarerr 2010/04/08 v1.3 Providing info/warning/message (HO)
)
(C:\Softwares\CTeX\work\CTEX\MiKTeX\tex\generic\oberdiek\ltxcmds.sty
Package: ltxcmds 2011/04/18 v1.20 LaTeX kernel commands for general use (HO)
)
\Gread@gobject=\count116
))
\Gin@req@height=\dimen124
\Gin@req@width=\dimen125
)
("D:\contribute\ECCV2020\Social Relation\camera ready\supp\comment.sty"
\CommentStream=\write3

Excluding comment 'comment')
(C:\Softwares\CTeX\work\CTEX\MiKTeX\tex\latex\ams\math\amsmath.sty
Package: amsmath 2000/07/18 v2.13 AMS math features
\@mathmargin=\skip45

For additional information on amsmath, use the `?' option.
(C:\Softwares\CTeX\work\CTEX\MiKTeX\tex\latex\ams\math\amstext.sty
Package: amstext 2000/06/29 v2.01

(C:\Softwares\CTeX\work\CTEX\MiKTeX\tex\latex\ams\math\amsgen.sty
File: amsgen.sty 1999/11/30 v2.0
\@emptytoks=\toks19
\ex@=\dimen126
))
(C:\Softwares\CTeX\work\CTEX\MiKTeX\tex\latex\ams\math\amsbsy.sty
Package: amsbsy 1999/11/29 v1.2d
\pmbraise@=\dimen127
)
(C:\Softwares\CTeX\work\CTEX\MiKTeX\tex\latex\ams\math\amsopn.sty
Package: amsopn 1999/12/14 v2.01 operator names
)
\inf@bad=\count117
LaTeX Info: Redefining \frac on input line 211.
\uproot@=\count118
\leftroot@=\count119
LaTeX Info: Redefining \overline on input line 307.
\classnum@=\count120
\DOTSCASE@=\count121
LaTeX Info: Redefining \ldots on input line 379.
LaTeX Info: Redefining \dots on input line 382.
LaTeX Info: Redefining \cdots on input line 467.
\Mathstrutbox@=\box54
\strutbox@=\box55
\big@size=\dimen128
LaTeX Font Info:    Redeclaring font encoding OML on input line 567.
LaTeX Font Info:    Redeclaring font encoding OMS on input line 568.


Package amsmath Warning: Unable to redefine math accent \vec.

\macc@depth=\count122
\c@MaxMatrixCols=\count123
\dotsspace@=\muskip10
\c@parentequation=\count124
\dspbrk@lvl=\count125
\tag@help=\toks20
\row@=\count126
\column@=\count127
\maxfields@=\count128
\andhelp@=\toks21
\eqnshift@=\dimen129
\alignsep@=\dimen130
\tagshift@=\dimen131
\tagwidth@=\dimen132
\totwidth@=\dimen133
\lineht@=\dimen134
\@envbody=\toks22
\multlinegap=\skip46
\multlinetaggap=\skip47
\mathdisplay@stack=\toks23
LaTeX Info: Redefining \[ on input line 2666.
LaTeX Info: Redefining \] on input line 2667.
) (C:\Softwares\CTeX\work\CTEX\MiKTeX\tex\latex\amsfonts\amssymb.sty
Package: amssymb 2009/06/22 v3.00

(C:\Softwares\CTeX\work\CTEX\MiKTeX\tex\latex\amsfonts\amsfonts.sty
Package: amsfonts 2009/06/22 v3.00 Basic AMSFonts support
\symAMSa=\mathgroup4
\symAMSb=\mathgroup5
LaTeX Font Info:    Overwriting math alphabet `\mathfrak' in version `bold'
(Font)                  U/euf/m/n --> U/euf/b/n on input line 96.
))
(C:\Softwares\CTeX\work\CTEX\MiKTeX\tex\latex\graphics\color.sty
Package: color 2005/11/14 v1.0j Standard LaTeX Color (DPC)

(C:\Softwares\CTeX\work\CTEX\MiKTeX\tex\latex\00miktex\color.cfg
File: color.cfg 2007/01/18 v1.5 color configuration of teTeX/TeXLive
)
Package color Info: Driver file: pdftex.def on input line 130.
)
(C:\Softwares\CTeX\work\CTEX\MiKTeX\tex\latex\graphics\epsfig.sty
Package: epsfig 1999/02/16 v1.7a (e)psfig emulation (SPQR)
\epsfxsize=\dimen135
\epsfysize=\dimen136
)
(C:\Softwares\CTeX\work\CTEX\MiKTeX\tex\latex\tools\bm.sty
Package: bm 2004/02/26 v1.1c Bold Symbol Support (DPC/FMi)
\symboldoperators=\mathgroup6
\symboldletters=\mathgroup7
\symboldsymbols=\mathgroup8
LaTeX Font Info:    Redeclaring math alphabet \mathbf on input line 138.
LaTeX Info: Redefining \bm on input line 204.
)
(C:\Softwares\CTeX\work\CTEX\MiKTeX\tex\latex\multirow\multirow.sty
\bigstrutjot=\dimen137
)
(C:\Softwares\CTeX\work\CTEX\MiKTeX\tex\latex\booktabs\booktabs.sty
Package: booktabs 2005/04/14 v1.61803 publication quality tables
\heavyrulewidth=\dimen138
\lightrulewidth=\dimen139
\cmidrulewidth=\dimen140
\belowrulesep=\dimen141
\belowbottomsep=\dimen142
\aboverulesep=\dimen143
\abovetopsep=\dimen144
\cmidrulesep=\dimen145
\cmidrulekern=\dimen146
\defaultaddspace=\dimen147
\@cmidla=\count129
\@cmidlb=\count130
\@aboverulesep=\dimen148
\@belowrulesep=\dimen149
\@thisruleclass=\count131
\@lastruleclass=\count132
\@thisrulewidth=\dimen150
)
(C:\Softwares\CTeX\work\CTEX\MiKTeX\tex\latex\wrapfig\wrapfig.sty
\wrapoverhang=\dimen151
\WF@size=\dimen152
\c@WF@wrappedlines=\count133
\WF@box=\box56
\WF@everypar=\toks24
Package: wrapfig 2003/01/31  v 3.6
)
(C:\Softwares\CTeX\work\CTEX\MiKTeX\tex\latex\tools\enumerate.sty
Package: enumerate 1999/03/05 v3.00 enumerate extensions (DPC)
\@enLab=\toks25
)
("D:\contribute\ECCV2020\Social Relation\camera ready\supp\2287-supp.aux")
LaTeX Font Info:    Checking defaults for OML/cmm/m/it on input line 25.
LaTeX Font Info:    ... okay on input line 25.
LaTeX Font Info:    Checking defaults for T1/cmr/m/n on input line 25.
LaTeX Font Info:    ... okay on input line 25.
LaTeX Font Info:    Checking defaults for OT1/cmr/m/n on input line 25.
LaTeX Font Info:    ... okay on input line 25.
LaTeX Font Info:    Checking defaults for OMS/cmsy/m/n on input line 25.
LaTeX Font Info:    ... okay on input line 25.
LaTeX Font Info:    Checking defaults for OMX/cmex/m/n on input line 25.
LaTeX Font Info:    ... okay on input line 25.
LaTeX Font Info:    Checking defaults for U/cmr/m/n on input line 25.
LaTeX Font Info:    ... okay on input line 25.

(C:\Softwares\CTeX\work\CTEX\MiKTeX\tex\context\base\supp-pdf.mkii
[Loading MPS to PDF converter (version 2006.09.02).]
\scratchcounter=\count134
\scratchdimen=\dimen153
\scratchbox=\box57
\nofMPsegments=\count135
\nofMParguments=\count136
\everyMPshowfont=\toks26
\MPscratchCnt=\count137
\MPscratchDim=\dimen154
\MPnumerator=\count138
\makeMPintoPDFobject=\count139
\everyMPtoPDFconversion=\toks27
)
LaTeX Font Info:    Try loading font information for U+msa on input line 52.
 (C:\Softwares\CTeX\work\CTEX\MiKTeX\tex\latex\amsfonts\umsa.fd
File: umsa.fd 2009/06/22 v3.00 AMS symbols A
)
LaTeX Font Info:    Try loading font information for U+msb on input line 52.

(C:\Softwares\CTeX\work\CTEX\MiKTeX\tex\latex\amsfonts\umsb.fd
File: umsb.fd 2009/06/22 v3.00 AMS symbols B
)
LaTeX Font Info:    Try loading font information for OMS+cmtt on input line 52.

LaTeX Font Info:    No file OMScmtt.fd. on input line 52.


LaTeX Font Warning: Font shape `OMS/cmtt/m/n' undefined
(Font)              using `OMS/cmsy/m/n' instead
(Font)              for symbol `textbraceleft' on input line 52.


pdfTeX warning: pdflatex.exe (file D:/contribute/ECCV2020/Social Relation/camer
a ready/supp/framework2.pdf): PDF inclusion: found PDF version <1.7>, but at mo
st version <1.5> allowed
<framework2.pdf, id=1, 683.82135pt x 400.20929pt>
File: framework2.pdf Graphic file (type pdf)
 <use framework2.pdf>
Package pdftex.def Info: framework2.pdf used on input line 64.
(pdftex.def)             Requested size: 312.40906pt x 182.84052pt.
 [1


{C:/Softwares/CTeX/work/CTEX/UserData/pdftex/config/pdftex.map{Unicode.sfd}{UGB
K.sfd}} <D:/contribute/ECCV2020/Social Relation/camera ready/supp/framework2.pd
f>]
[2] ("D:\contribute\ECCV2020\Social Relation\camera ready\supp\2287-supp.aux")

LaTeX Font Warning: Some font shapes were not available, defaults substituted.

 ) 
Here is how much of TeX's memory you used:
 2782 strings out of 495354
 35041 string characters out of 3182739
 94829 words of memory out of 3000000
 5896 multiletter control sequences out of 15000+200000
 14421 words of font info for 54 fonts, out of 3000000 for 9000
 14 hyphenation exceptions out of 8191
 29i,8n,24p,673b,237s stack positions out of 5000i,500n,10000p,200000b,50000s
<C:/Softwares/CTeX/work/CTEX/MiKTeX/fonts/type1/public/amsfonts/cm/cmbx12.pfb
><C:/Softwares/CTeX/work/CTEX/MiKTeX/fonts/type1/public/amsfonts/cm/cmbx9.pfb><
C:/Softwares/CTeX/work/CTEX/MiKTeX/fonts/type1/public/amsfonts/cm/cmmi7.pfb><C:
/Softwares/CTeX/work/CTEX/MiKTeX/fonts/type1/public/amsfonts/cm/cmr10.pfb><C:/S
oftwares/CTeX/work/CTEX/MiKTeX/fonts/type1/public/amsfonts/cm/cmr6.pfb><C:/Soft
wares/CTeX/work/CTEX/MiKTeX/fonts/type1/public/amsfonts/cm/cmr7.pfb><C:/Softwar
es/CTeX/work/CTEX/MiKTeX/fonts/type1/public/amsfonts/cm/cmr9.pfb><C:/Softwares/
CTeX/work/CTEX/MiKTeX/fonts/type1/public/amsfonts/cm/cmsy6.pfb><C:/Softwares/CT
eX/work/CTEX/MiKTeX/fonts/type1/public/amsfonts/cm/cmsy7.pfb><C:/Softwares/CTeX
/work/CTEX/MiKTeX/fonts/type1/public/amsfonts/cm/cmsy9.pfb><C:/Softwares/CTeX/w
ork/CTEX/MiKTeX/fonts/type1/public/amsfonts/cm/cmtt9.pfb>
Output written on 2287-supp.pdf (2 pages, 414669 bytes).
PDF statistics:
 103 PDF objects out of 1000 (max. 8388607)
 0 named destinations out of 1000 (max. 500000)
 6 words of extra memory for PDF output out of 10000 (max. 10000000)
