# Supplementary material
Source: ML conference proceedings conference paper supplement (https://www.ecva.net/papers/eccv_2020/papers_ECCV/html/123600018_ECCV_2020_paper.php)
Supplement: Supplementary file 3 [file 123600018-supp.zip › 2287-supp.tex.bak]

% updated April 2002 by Antje Endemann
% Based on CVPR 07 and LNCS, with modifications by DAF, AZ and elle, 2008 and AA, 2010, and CC, 2011; TT, 2014; AAS, 2016; AAS, 2020

\documentclass[runningheads]{llncs}
\usepackage{graphicx}
\usepackage{comment}
\usepackage{amsmath,amssymb} % define this before the line numbering.
\usepackage{color}

\usepackage{epsfig}
\usepackage{bm}
\usepackage{multirow}
\usepackage{booktabs}
\usepackage{graphicx}
\usepackage{wrapfig}
\usepackage{enumerate}

% INITIAL SUBMISSION - The following two lines are NOT commented
% CAMERA READY - Comment OUT the following two lines
%\usepackage{ruler}
%\usepackage[width=122mm,left=12mm,paperwidth=146mm,height=193mm,top=12mm,paperheight=217mm]{geometry}
\renewcommand{\labelitemi}{$\bullet$}


\begin{document}
% \renewcommand\thelinenumber{\color[rgb]{0.2,0.5,0.8}\normalfont\sffamily\scriptsize\arabic{linenumber}\color[rgb]{0,0,0}}
% \renewcommand\makeLineNumber {\hss\thelinenumber\ \hspace{6mm} \rlap{\hskip\textwidth\ \hspace{6.5mm}\thelinenumber}}
% \linenumbers
\pagestyle{headings}
\mainmatter
\def\ECCVSubNumber{2287}  % Insert your submission number here

\title{Supplementary Materials of ``Graph-Based Social Relation Reasoning"} % Replace with your title


\titlerunning{Graph-Based Social Relation Reasoning}
\author{Wanhua Li\inst{1,2,3} \and
Yueqi Duan\inst{1,2,3,5,}$^{\dagger}$ \and
Jiwen Lu\inst{1,2,3,}$^{\ast}$ \and
Jianjiang Feng\inst{1,2,3} \and
Jie Zhou\inst{1,2,3,4}}
\authorrunning{W. Li et al.}
\institute{Department of Automation, Tsinghua University, China
\and State Key Lab of Intelligent Technologies and Systems, China
\and Beijing National Research Center for Information Science and Technology, China
\and Tsinghua Shenzhen International Graduate School, Tsinghua University, China
\and Stanford University \\
\email{li-wh17@mails.tsinghua.edu.cn,duanyq19@stanford.edu,
\{lujiwen,jfeng,jzhou\}@tsinghua.edu.cn}
}

\maketitle

\let\thefootnote\relax\footnotetext{$^{\dagger}$ Work done while at Tsinghua University.}
\let\thefootnote\relax\footnotetext{$^{\ast}$ Corresponding author}

%In this supplementary material, we first provide the pipeline of the proposed method, then we illustrate the convergence of our method with numerical results.
\section{Pipeline}


\begin{figure}[h]
  \centering
  \includegraphics[width=1.0\linewidth]{framework2.pdf}
  \caption{ An overall pipeline of our proposed method. For a given image, we first use a CNN to extract features. Then the features of people in the image are obtained from the last shared feature map using an RoI pooling layer. These features are set as the initial node embeddings. Several virtual relation graphs with shared node representations are constructed to exploit type-specific logical constraints. Finally, the proposed GR$^2$N is used to generate a reasonable  and consistent social relation graph. }
  \label{fig:framework}
\end{figure}


Fig. \ref{fig:framework} depicts the overall pipeline of our proposed GR$^2$N.

\section{Convergence}
To show the convergence of our method, we list the numerical results of GR$^2$N on the PIPA dataset in Table \ref{table:convergece}. We observe that our method eventually converges.

\begin{table}[h]
  \caption{We show how the loss function value of our method changes during the training stage as the number of iterations increases.}
%  \vspace {0.2cm}
  \label{table:convergece}
  \renewcommand\tabcolsep{7pt}
  \centering
  \begin{tabular}{lccccccc}
    \toprule
    Iters & 0 & 10 & 50 & 100 & 500 & 1000 & 5000 \\
    \midrule
    Loss & 0.676 & 0.520 & 0.374 & 0.258 & 0.144 & 0.102 & 0.087 \\
    \bottomrule
  \end{tabular}
\end{table}


% ---- Bibliography ----
%
% BibTeX users should specify bibliography style 'splncs04'.
% References will then be sorted and formatted in the correct style.
%
%\bibliographystyle{splncs04}
%\bibliography{egbib}
\end{document}
