# Supplementary material
Source: ML conference proceedings conference paper supplement (https://www.ecva.net/papers/eccv_2020/papers_ECCV/html/123600018_ECCV_2020_paper.php)
Supplement: Supplementary file 3 [file 123600018-supp.zip › egbib.bib.bak]

@inproceedings{girshick2015fast,
  title={Fast r-cnn},
  author={Girshick, Ross},
  booktitle={ICCV},
  pages={1440--1448},
  year={2015}
}
@inproceedings{ren2015faster,
  title={Faster r-cnn: Towards real-time object detection with region proposal networks},
  author={Ren, Shaoqing and He, Kaiming and Girshick, Ross and Sun, Jian},
  booktitle={NeurIPS},
  pages={91--99},
  year={2015}
}

@inproceedings{gilmer2017neural,
  title={Neural message passing for quantum chemistry},
  author={Gilmer, Justin and Schoenholz, Samuel S and Riley, Patrick F and Vinyals, Oriol and Dahl, George E},
  booktitle={ICML},
  pages={1263--1272},
  year={2017},
}
@inproceedings{cho2014learning,
  title={Learning phrase representations using RNN encoder-decoder for statistical machine translation},
  author={Cho, Kyunghyun and Van Merri{\"e}nboer, Bart and Gulcehre, Caglar and Bahdanau, Dzmitry and Bougares, Fethi and Schwenk, Holger and Bengio, Yoshua},
  booktitle={EMNLP},
  year={2014}
}
@inproceedings{sun2017domain,
  title={A domain based approach to social relation recognition},
  author={Sun, Qianru and Schiele, Bernt and Fritz, Mario},
  booktitle={CVPR},
  pages={3481--3490},
  year={2017}
}
@inproceedings{zhang2015beyond,
  title={Beyond frontal faces: Improving person recognition using multiple cues},
  author={Zhang, Ning and Paluri, Manohar and Taigman, Yaniv and Fergus, Rob and Bourdev, Lubomir},
  booktitle={CVPR},
  pages={4804--4813},
  year={2015}
}
@article{bugental2000acquisition,
  title={Acquisition of the algorithms of social life: A domain-based approach.},
  author={Bugental, Daphne Blunt},
  journal={Psychological Bulletin},
  volume={126},
  number={2},
  pages={187},
  year={2000},
  publisher={American Psychological Association}
}
@inproceedings{li2017dual,
  title={Dual-glance model for deciphering social relationships},
  author={Li, Junnan and Wong, Yongkang and Zhao, Qi and Kankanhalli, Mohan S},
  booktitle={ICCV},
  pages={2650--2659},
  year={2017}
}
@inproceedings{Wang2018Deep,
    title={Deep Reasoning with Knowledge Graph for Social Relationship Understanding},
    author={Zhouxia, Wang and Tianshui, Chen and Jimmy, Ren and Weihao, Yu and Hui, Cheng and Liang, Lin},
    booktitle={IJCAI},
    year={2018}
}
@article{russakovsky2015imagenet,
  title={Imagenet large scale visual recognition challenge},
  author={Russakovsky, Olga and Deng, Jia and Su, Hao and Krause, Jonathan and Satheesh, Sanjeev and Ma, Sean and Huang, Zhiheng and Karpathy, Andrej and Khosla, Aditya and Bernstein, Michael and others},
  journal={IJCV},
  volume={115},
  number={3},
  pages={211--252},
  year={2015},
  publisher={Springer}
}
@inproceedings{kingma2014adam,
  title={Adam: A method for stochastic optimization},
  author={Kingma, Diederik P and Ba, Jimmy},
  booktitle={ICLR},
  year={2015}
}
@inproceedings{paszke2017automatic,
  title={Automatic differentiation in pytorch},
  author={Paszke, Adam and Gross, Sam and Chintala, Soumith and Chanan, Gregory and Yang, Edward and DeVito, Zachary and Lin, Zeming and Desmaison, Alban and Antiga, Luca and Lerer, Adam},
  booktitle={NeurIPSW},
  year={2017}
}
@article{li2015gated,
  title={Gated graph sequence neural networks},
  author={Li, Yujia and Tarlow, Daniel and Brockschmidt, Marc and Zemel, Richard},
  journal={ICLR},
  year={2016}
}
@inproceedings{Arushi2019social,
  title={An End-to-End Network for Generating Social Relationship Graphs},
  author={Goel, Arushi and Ma, Keng Teck and Tan, Cheston},
  booktitle={CVPR},
  pages={11186--11195},
  year={2019}
}
@inproceedings{kipf2017semi,
  title={Semi-Supervised Classification with Graph Convolutional Networks},
  author={Kipf, Thomas N. and Welling, Max},
  booktitle={ICLR},
  year={2017}
}
@inproceedings{wang2018videos,
  title={Videos as space-time region graphs},
  author={Wang, Xiaolong and Gupta, Abhinav},
  booktitle={ECCV},
  pages={399--417},
  year={2018}
}
@inproceedings{li2018deeper,
  title={Deeper insights into graph convolutional networks for semi-supervised learning},
  author={Li, Qimai and Han, Zhichao and Wu, Xiao-Ming},
  booktitle={AAAI},
  year={2018}
}
@article{lu2013neighborhood,
  title={Neighborhood repulsed metric learning for kinship verification},
  author={Lu, Jiwen and Zhou, Xiuzhuang and Tan, Yap-Pen and Shang, Yuanyuan and Zhou, Jie},
  journal={TPAMI},
  volume={36},
  number={2},
  pages={331--345},
  year={2013},
  publisher={IEEE}
}
@inproceedings{wang2010seeing,
  title={Seeing people in social context: Recognizing people and social relationships},
  author={Wang, Gang and Gallagher, Andrew and Luo, Jiebo and Forsyth, David},
  booktitle={ECCV},
  pages={169--182},
  year={2010},
}
@inproceedings{ramanathan2013social,
  title={Social role discovery in human events},
  author={Ramanathan, Vignesh and Yao, Bangpeng and Fei-Fei, Li},
  booktitle={CVPR},
  pages={2475--2482},
  year={2013}
}
@inproceedings{shao2013you,
  title={What do you do? occupation recognition in a photo via social context},
  author={Shao, Ming and Li, Liangyue and Fu, Yun},
  booktitle={ICCV},
  pages={3631--3638},
  year={2013}
}
@article{zhang2018facial,
  title={From facial expression recognition to interpersonal relation prediction},
  author={Zhang, Zhanpeng and Luo, Ping and Loy, Chen Change and Tang, Xiaoou},
  journal={IJCV},
  volume={126},
  number={5},
  pages={550--569},
  year={2018},
  publisher={Springer}
}
@inproceedings{gori2005new,
  title={A new model for learning in graph domains},
  author={Gori, Marco and Monfardini, Gabriele and Scarselli, Franco},
  booktitle={IJCNN},
  pages={729--734},
  year={2005},
}
@article{scarselli2008graph,
  title={The graph neural network model},
  author={Scarselli, Franco and Gori, Marco and Tsoi, Ah Chung and Hagenbuchner, Markus and Monfardini, Gabriele},
  journal={TNNLS},
  volume={20},
  number={1},
  pages={61--80},
  year={2008},
  publisher={IEEE}
}
@article{bruna2013spectral,
  title={Spectral networks and locally connected networks on graphs},
  author={Bruna, Joan and Zaremba, Wojciech and Szlam, Arthur and LeCun, Yann},
  journal={arXiv preprint arXiv:1312.6203},
  year={2013}
}
@inproceedings{defferrard2016convolutional,
  title={Convolutional neural networks on graphs with fast localized spectral filtering},
  author={Defferrard, Micha{\"e}l and Bresson, Xavier and Vandergheynst, Pierre},
  booktitle={NeurIPS},
  pages={3844--3852},
  year={2016}
}

@inproceedings{velickovic2018graph,
  title="{Graph Attention Networks}",
  author={Veli{\v{c}}kovi{\'{c}}, Petar and Cucurull, Guillem and Casanova, Arantxa and Romero, Adriana and Li{\`{o}}, Pietro and Bengio, Yoshua},
  booktitle={ICLR},
  year={2018},
}
@inproceedings{xu2018powerful,
  title={How Powerful are Graph Neural Networks?},
  author={Xu, Keyulu and Hu, Weihua and Leskovec, Jure and Jegelka, Stefanie},
  booktitle={ICLR},
  year={2019}
}
@inproceedings{hamilton2017inductive,
  title={Inductive representation learning on large graphs},
  author={Hamilton, Will and Ying, Zhitao and Leskovec, Jure},
  booktitle={NeurIPS},
  pages={1024--1034},
  year={2017}
}
@inproceedings{schlichtkrull2018modeling,
  title={Modeling relational data with graph convolutional networks},
  author={Schlichtkrull, Michael and Kipf, Thomas N and Bloem, Peter and Van Den Berg, Rianne and Titov, Ivan and Welling, Max},
  booktitle={ESWC},
  pages={593--607},
  year={2018},
}
@inproceedings{Chen2019graphreason,
  title={Graph-based global reasoning networks},
  author={Chen, Yunpeng and Rohrbach, Marcus and Yan, Zhicheng and Shuicheng, Yan and Feng, Jiashi and Kalantidis, Yannis},
  booktitle={CVPR},
  pages={433--442},
  year={2019}
}
@inproceedings{Sun2019actionforecast,
  author    = {Chen, Sun and
               Abhinav, Shrivastava and
               Carl, Vondrick and
               Rahul, Sukthankar and
               Kevin, Murphy and
               Cordelia, Schmid},
  title     = {Relational Action Forecasting},
  booktitle   = {CVPR},
  year      = {2019},
}
@article{fiske1992four,
  title={The four elementary forms of sociality: framework for a unified theory of social relations.},
  author={Fiske, Alan P},
  journal={Psychological Review},
  volume={99},
  number={4},
  pages={689},
  year={1992},
  publisher={American Psychological Association}
}
@article{conte1981circumplex,
  title={A circumplex model for interpersonal personality traits.},
  author={Conte, Hope R and Plutchik, Robert},
  journal={Journal of Personality and Social Psychology},
  volume={40},
  number={4},
  pages={701},
  year={1981},
  publisher={American Psychological Association}
}
@inproceedings{lan2012social,
  title={Social roles in hierarchical models for human activity recognition},
  author={Lan, Tian and Sigal, Leonid and Mori, Greg},
  booktitle={CVPR},
  pages={1354--1361},
  year={2012},
}
@article{reis2000relationship,
  title={The relationship context of human behavior and development.},
  author={Reis, Harry T and Collins, W Andrew and Berscheid, Ellen},
  journal={Psychological Bulletin},
  volume={126},
  number={6},
  pages={844},
  year={2000},
  publisher={American Psychological Association}
}
@inproceedings{deng2016structure,
  title={Structure inference machines: Recurrent neural networks for analyzing relations in group activity recognition},
  author={Deng, Zhiwei and Vahdat, Arash and Hu, Hexiang and Mori, Greg},
  booktitle={CVPR},
  pages={4772--4781},
  year={2016}
}
@inproceedings{xu2017scene,
  title={Scene graph generation by iterative message passing},
  author={Xu, Danfei and Zhu, Yuke and Choy, Christopher B and Fei-Fei, Li},
  booktitle={CVPR},
  pages={5410--5419},
  year={2017}
}
@inproceedings{kipf2018neural,
  title={Neural relational inference for interacting systems},
  author={Kipf, Thomas and Fetaya, Ethan and Wang, Kuan-Chieh and Welling, Max and Zemel, Richard},
  booktitle={ICML},
  year={2018}
}
@inproceedings{sun2019stochastic,
  title={Stochastic Prediction of Multi-Agent Interactions from Partial Observations},
  author={Sun, Chen and Karlsson, Per and Wu, Jiajun and Tenenbaum, Joshua B and Murphy, Kevin},
  booktitle={ICLR},
  year={2019}
}
@inproceedings{tacchetti2018relational,
  title={Relational forward models for multi-agent learning},
  author={Tacchetti, Andrea and Song, H Francis and Mediano, Pedro AM and Zambaldi, Vinicius and Rabinowitz, Neil C and Graepel, Thore and Botvinick, Matthew and Battaglia, Peter W},
  booktitle={ICLR},
  year={2019}
}
@inproceedings{redmon2016you,
  title={You only look once: Unified, real-time object detection},
  author={Redmon, Joseph and Divvala, Santosh and Girshick, Ross and Farhadi, Ali},
  booktitle={CVPR},
  pages={779--788},
  year={2016}
}
@inproceedings{redmon2017yolo9000,
  title={YOLO9000: better, faster, stronger},
  author={Redmon, Joseph and Farhadi, Ali},
  booktitle={CVPR},
  pages={7263--7271},
  year={2017}
}
@inproceedings{shu2015joint,
  title={Joint inference of groups, events and human roles in aerial videos},
  author={Shu, Tianmin and Xie, Dan and Rothrock, Brandon and Todorovic, Sinisa and Chun Zhu, Song},
  booktitle={CVPR},
  pages={4576--4584},
  year={2015}
}
@inproceedings{song2011predicting,
  title={Predicting occupation via human clothing and contexts},
  author={Song, Zheng and Wang, Meng and Hua, Xian-sheng and Yan, Shuicheng},
  booktitle={ICCV},
  pages={1084--1091},
  year={2011},
}
@article{lu2017discriminative,
  title={Discriminative deep metric learning for face and kinship verification},
  author={Lu, Jiwen and Hu, Junlin and Tan, Yap-Peng},
  journal={TIP},
  volume={26},
  number={9},
  pages={4269--4282},
  year={2017},
  publisher={IEEE}
}
@inproceedings{li2020graph,
  title={Graph-Based Kinship Reasoning Network},
  author={Li, Wanhua and Zhang, Yingqiang and Lv, Kangchen and Lu, Jiwen and Feng, Jianjiang and Zhou, Jie},
  booktitle={ICME},
  pages={1--6},
  year={2020},
}
@inproceedings{li2019bridgenet,
  title={Bridgenet: A continuity-aware probabilistic network for age estimation},
  author={Li, Wanhua and Lu, Jiwen and Feng, Jianjiang and Xu, Chunjing and Zhou, Jie and Tian, Qi},
  booktitle={CVPR},
  pages={1145--1154},
  year={2019}
}
@inproceedings{deng2019arcface,
  title={Arcface: Additive angular margin loss for deep face recognition},
  author={Deng, Jiankang and Guo, Jia and Xue, Niannan and Zafeiriou, Stefanos},
  booktitle={CVPR},
  pages={4690--4699},
  year={2019}
}
@inproceedings{wang2014person,
  title={Person re-identification by video ranking},
  author={Wang, Taiqing and Gong, Shaogang and Zhu, Xiatian and Wang, Shengjin},
  booktitle={ECCV},
  pages={688--703},
  year={2014},
}
@inproceedings{zhang2019multi,
  title={Multi-Granularity Reasoning for Social Relation Recognition from Images},
  author={Zhang, Meng and Liu, Xinchen and Liu, Wu and Zhou, Anfu and Ma, Huadong and Mei, Tao},
  booktitle={2019 IEEE International Conference on Multimedia and Expo (ICME)},
  pages={1618--1623},
  year={2019},
  organization={IEEE}
}
