# Supplementary material
Source: ML conference proceedings conference paper supplement (https://www.ecva.net/papers/eccv_2020/papers_ECCV/html/123600018_ECCV_2020_paper.php)

**Image**

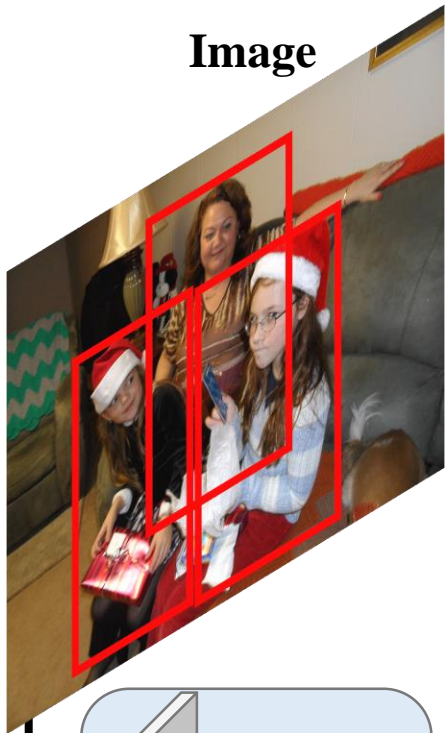

**CNN**

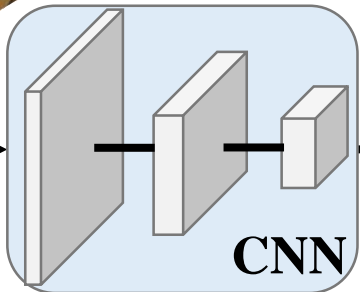

**Feature Map**

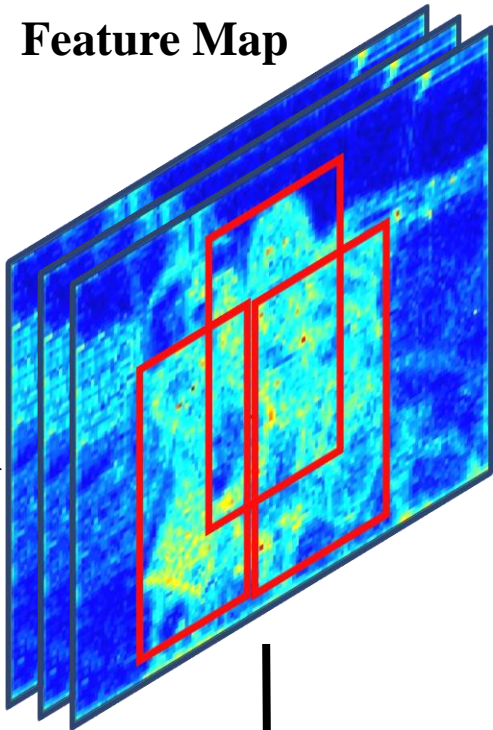

**ROI Pooling**

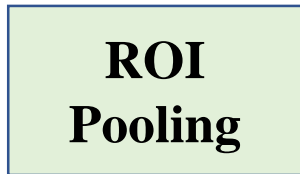

**Building Graph**

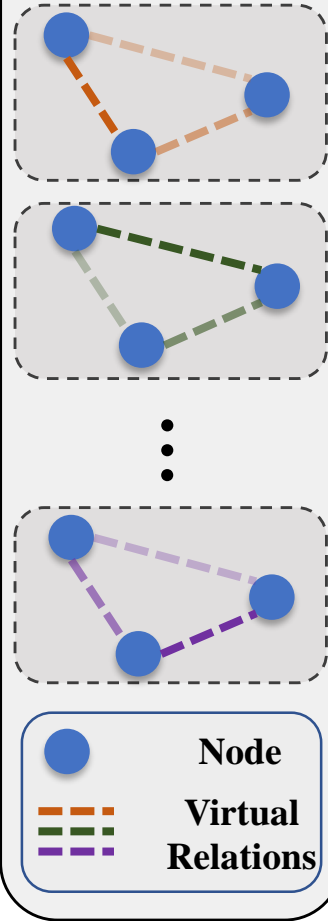

**Final Graph**

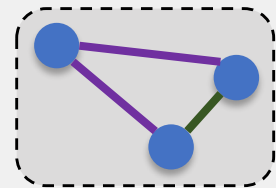

— siblings  
— mother-child

$GR^2N$

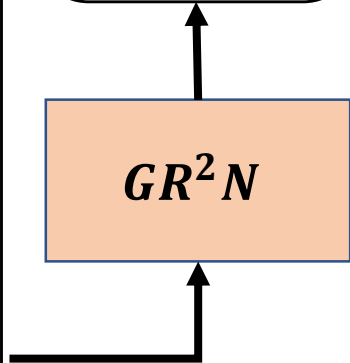

Supplement: Supplementary file 2 [file 123600018-supp.zip]
